# Supplementary material for: Vaccine delivery by zwitterionic polysaccharide-based hydrogel microparticles showing enhanced immunogenicity and suppressed foreign body responses
Source: Royal Society of Chemistry journal article supplement (doi:10.1039/d2bm01960d), 2023-01-01
Supplement: d2bm01960d10.pdf [file d2bm01960d10.pdf]

## Vaccine delivery by zwitterionic polysaccharide-based hydrogel microparticles showing enhanced immunogenicity and suppressed foreign body responses

Jin Teng Chung<sup>1</sup>, Chi Ming Laurence Lau<sup>1</sup>, Casper H.Y. Chung<sup>2</sup>, Mehrnoosh Rafiei<sup>1,3</sup>,  
Shuhuai Yao<sup>2</sup>, Ying Chau<sup>1</sup>

<sup>1</sup>Department of Chemical and Biological Engineering, The Hong Kong University of Science and Technology, Hong Kong SAR, China

<sup>2</sup>Department of Mechanical and Aerospace Engineering, The Hong Kong University of Science and Technology, Hong Kong SAR, China

<sup>3</sup>Institute for Nanoscience and Nanotechnology, Sharif University of Technology, Tehran, Iran.

Keywords: hydrogel; vaccine; immunotherapy; zwitterionic polymer; polysaccharides

### Supplementary Information

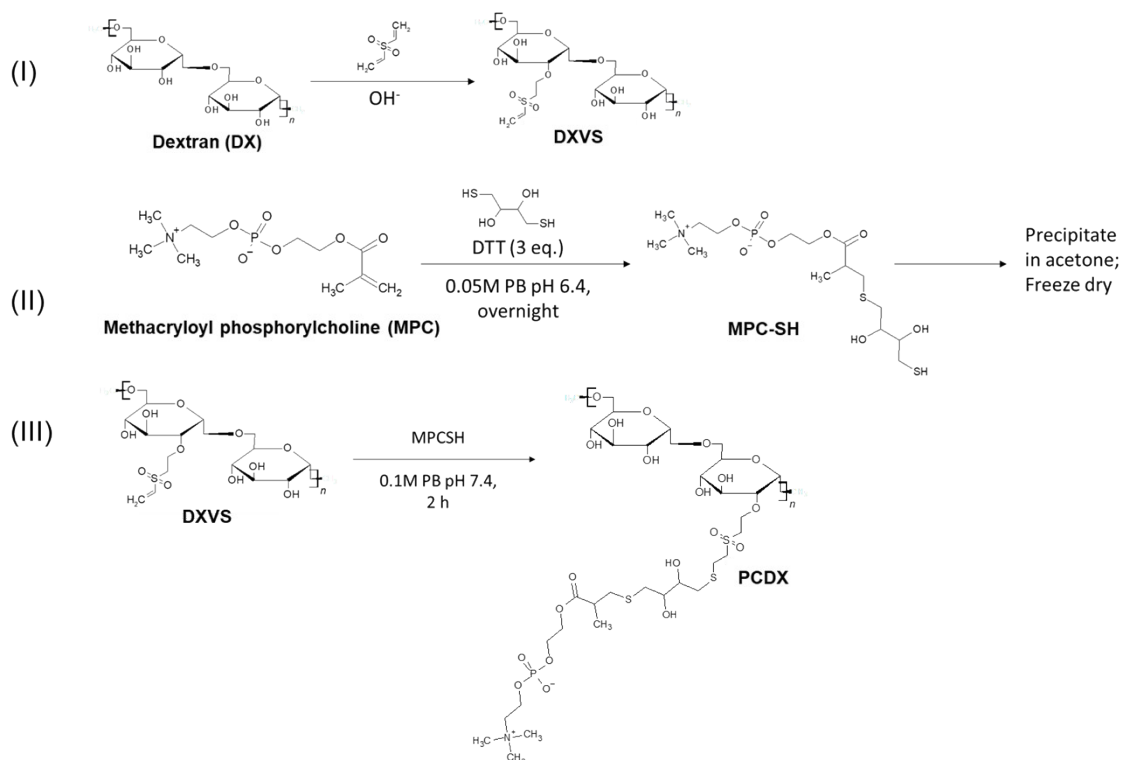

**Figure S1. The synthesis scheme of DXVS and zwitterionic PCDX. (I)** DX was activated with vinyl sulfone group (VS) by reacting DX at 5% wt/V polymer concentration with DVS, at molar ratio DVS:OH of 1.2:1. Reaction occurred in 0.02M NaOH and stopped with 0.02M HCl after various time points to control degree of modifications (DM). **(II)** MPC-SH was synthesized by reacting MPC to DTT at molar ratio MPC:DTT of 1:6 in 0.05M phosphate buffer, pH 6.4 overnight at room temperature. The product was extracted via acetone precipitation. **(III)** PC was synthesized by reacting MPC-SH with DXVS at molar ratio VS:SH of 1:3 in 0.1M phosphate buffer of pH 7.4 for 2 hour at room temperature.

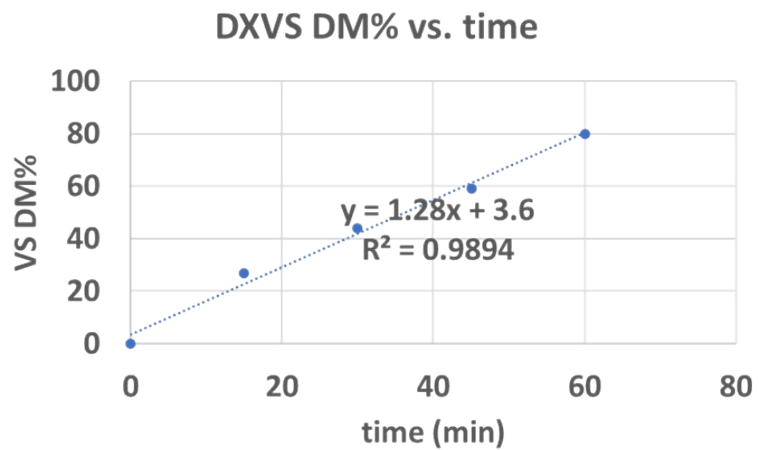

**Figure S2.** The relationship between the DM of VS on DX with time at 5% wt/V DX polymer concentration and 0.02M NaOH. Reactions were stopped with 0.02M HCl.

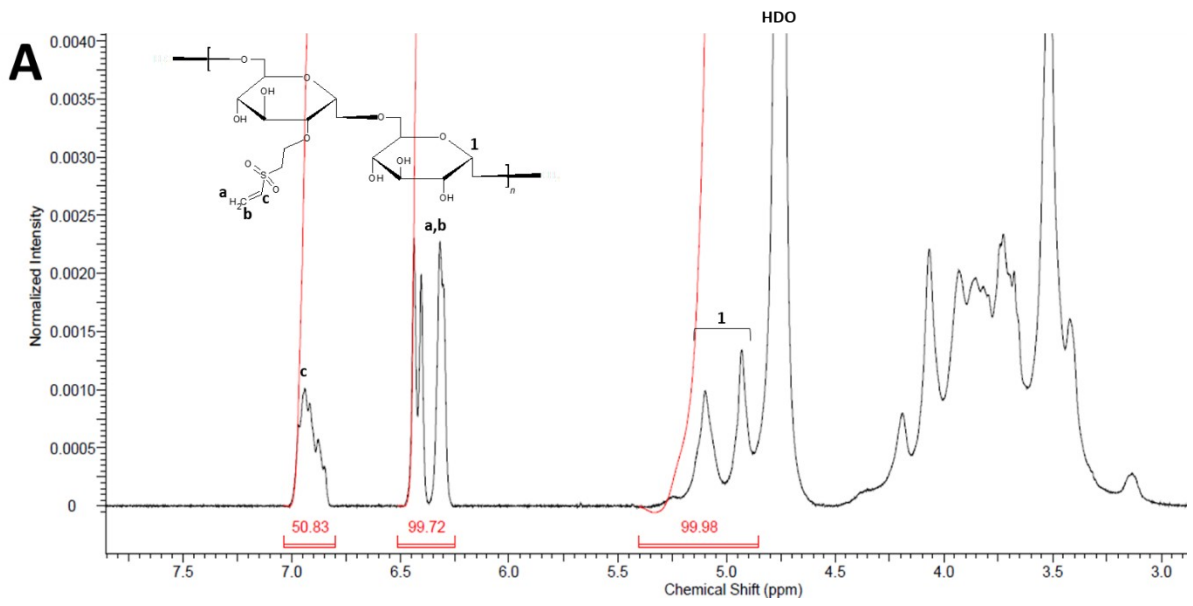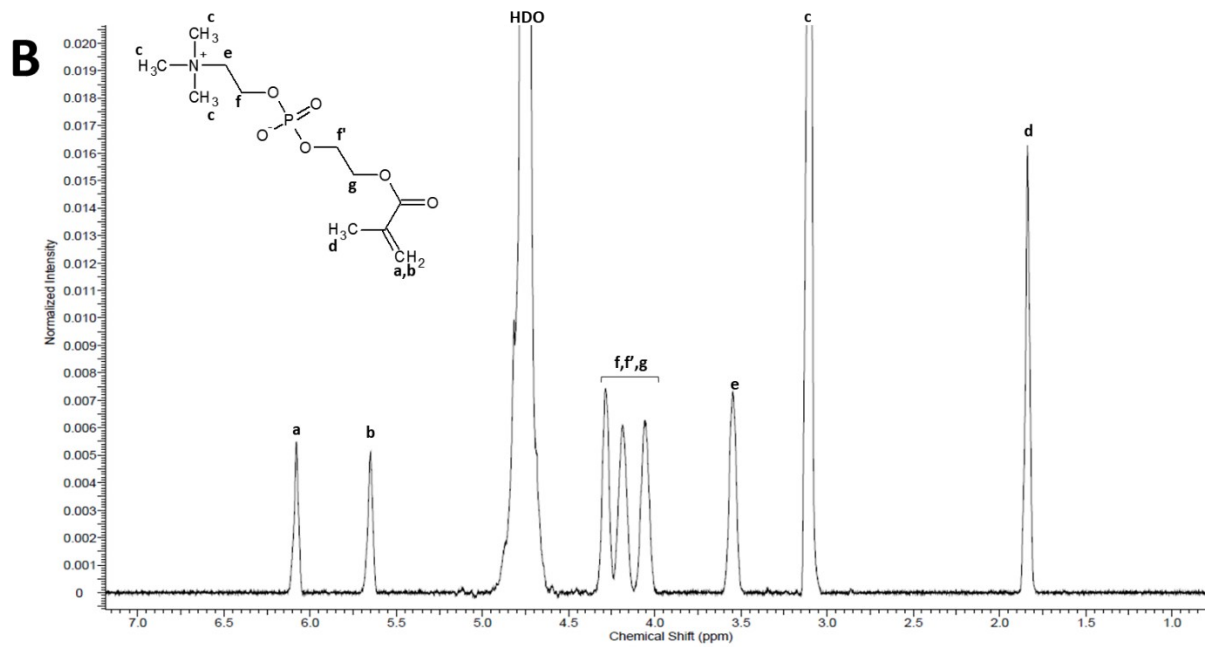

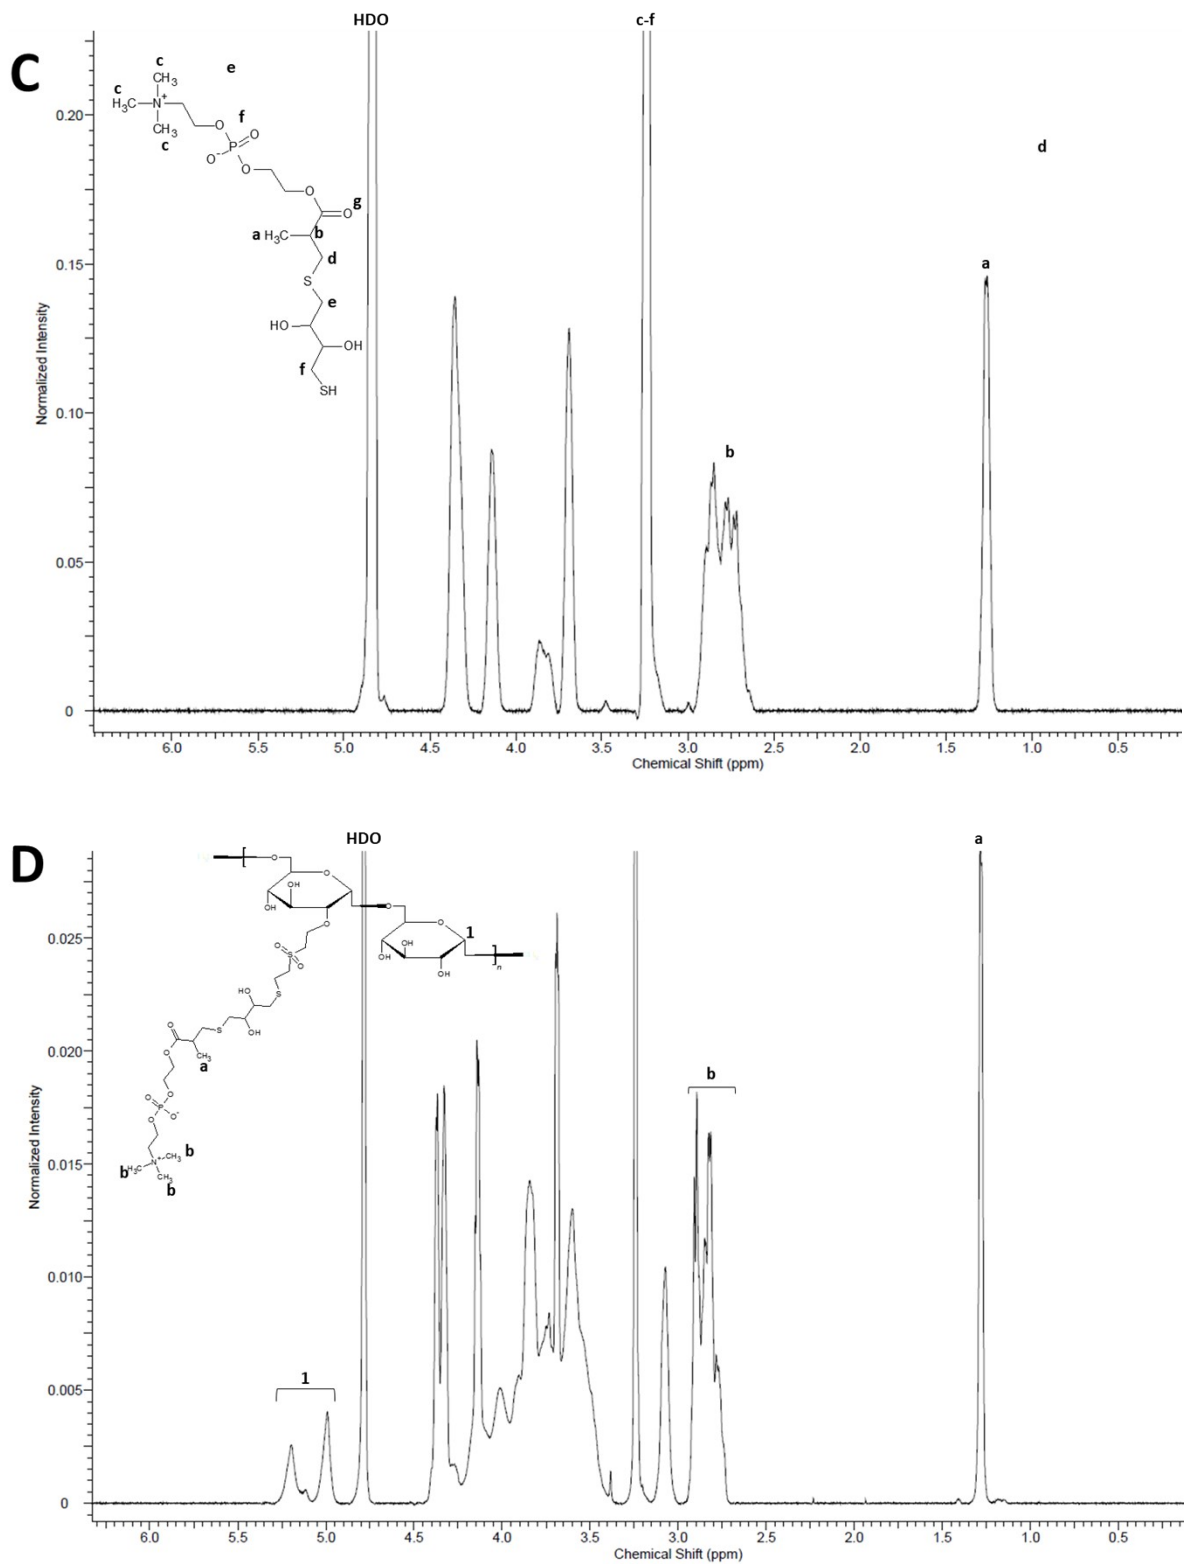

**Figure S3. The chemical structure and  $^1\text{H-NMR}$  spectra of A) VS functionalized DX, B) MPC, C) thiolated MPC, MPC-SH and D) DX modified with PC.**

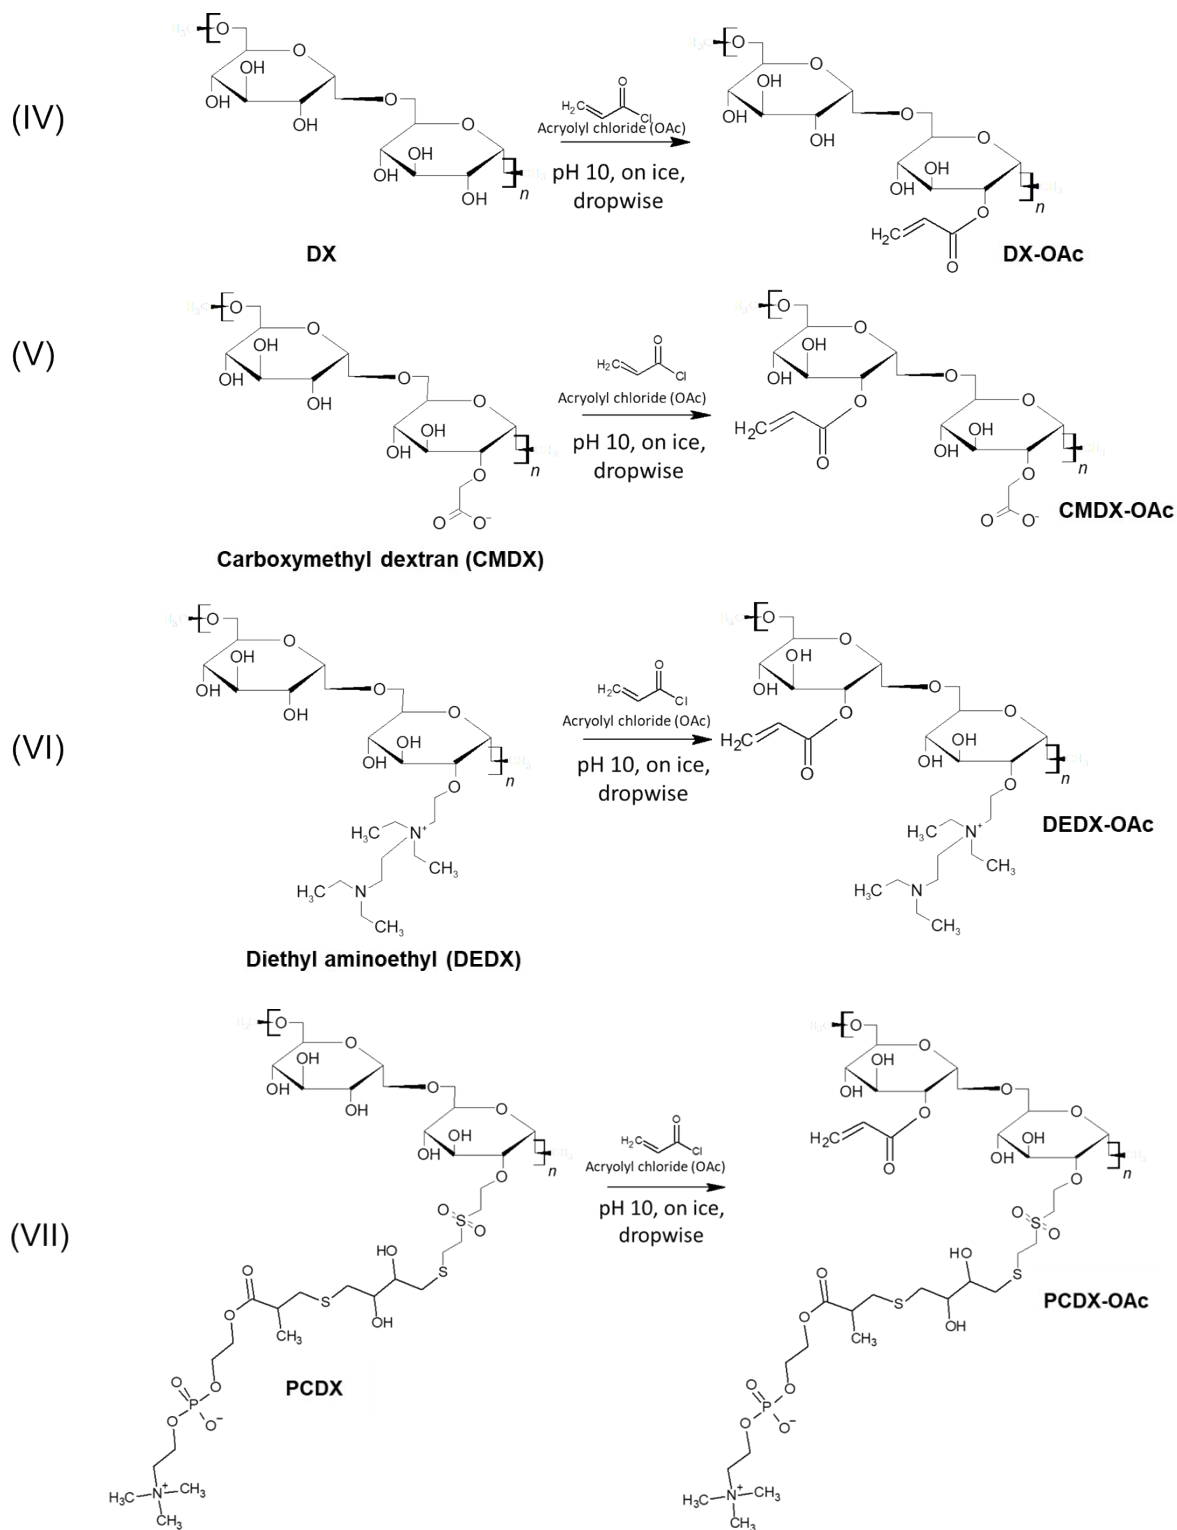

**Figure S4. The synthesis scheme -OAc functionalized DX and charge derivatives. (IV-VII) DX and charge derivatives, CMDX, DEDX and PCDX were activated with acryloyl group (-OAc) by reacting polysaccharides at 5% wt/V polymer concentration with acryloyl chloride, at a molar ratio OAc:OH of 0.5:1 in ddH<sub>2</sub>O. 5M NaOH was added dropwise to maintain reaction pH at 9 to 10 for 1 hour, in ice bath. Reaction was stopped with 6M HCl addition to pH 5. All -OAc functionalized products were purified with dialysis and lyophilized.**

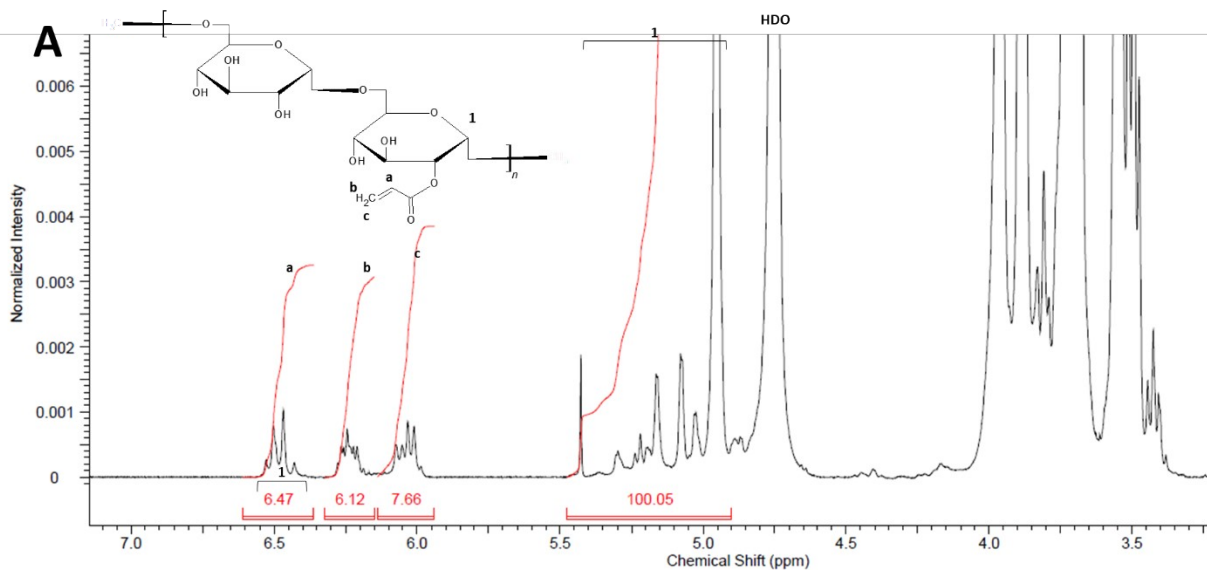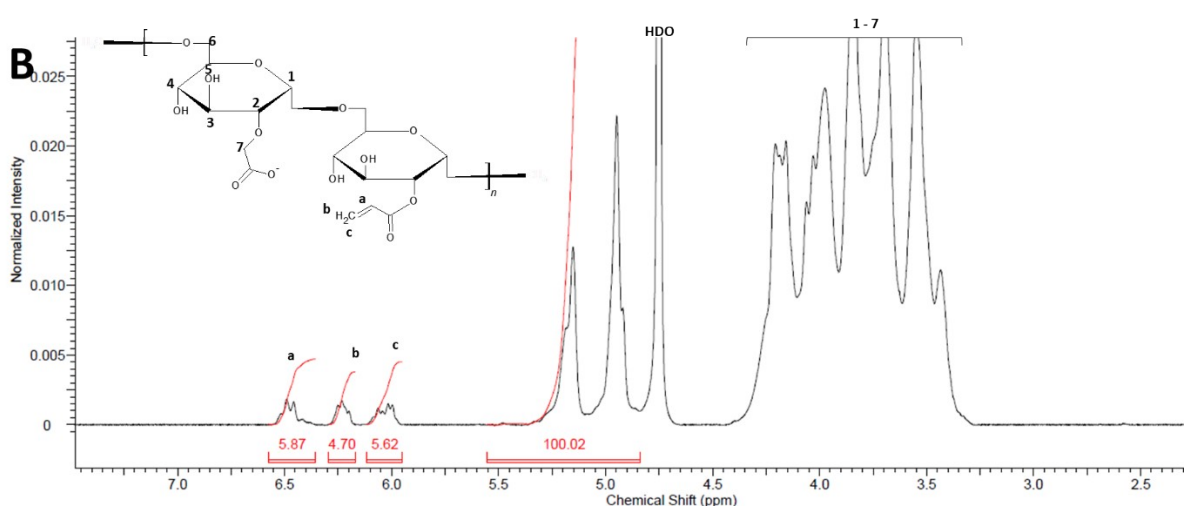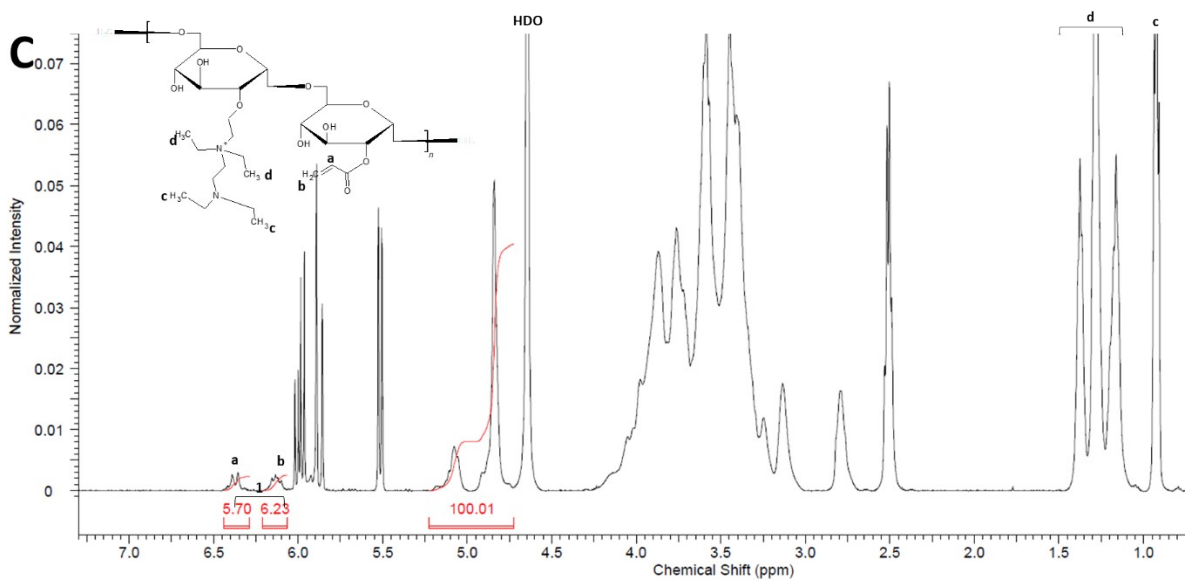

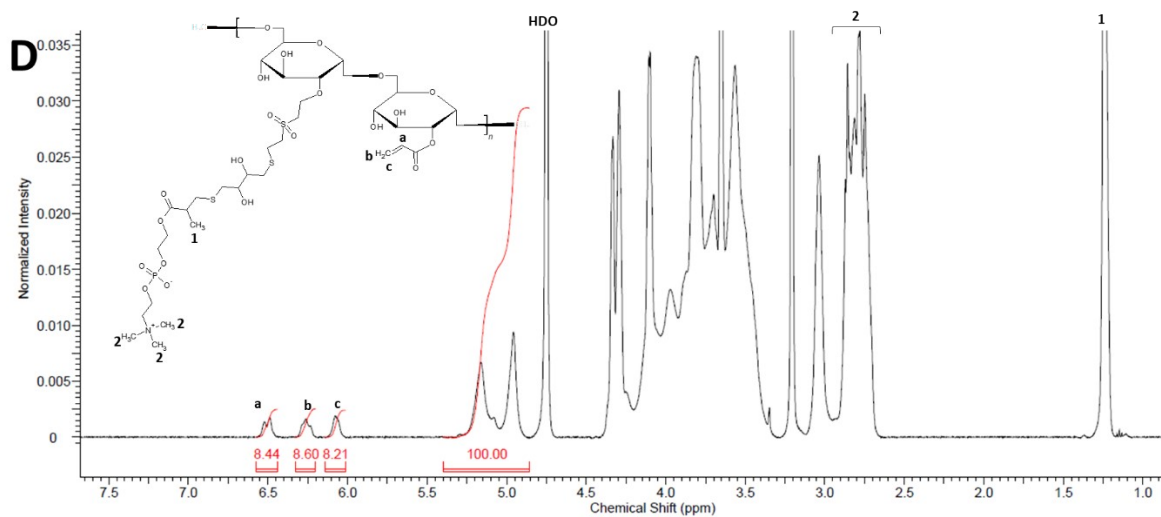

**Figure S5. The chemical structure and <sup>1</sup>H-NMR spectra of -OAc functionalized A) dextran (DX-OAc), B) carboxymethyl dextran (CMDX-OAc), C) diethyl aminoethyl dextran (DEDX-OAc) and D) phosphorylcholine-decorated dextran (PCDX-OAc).**

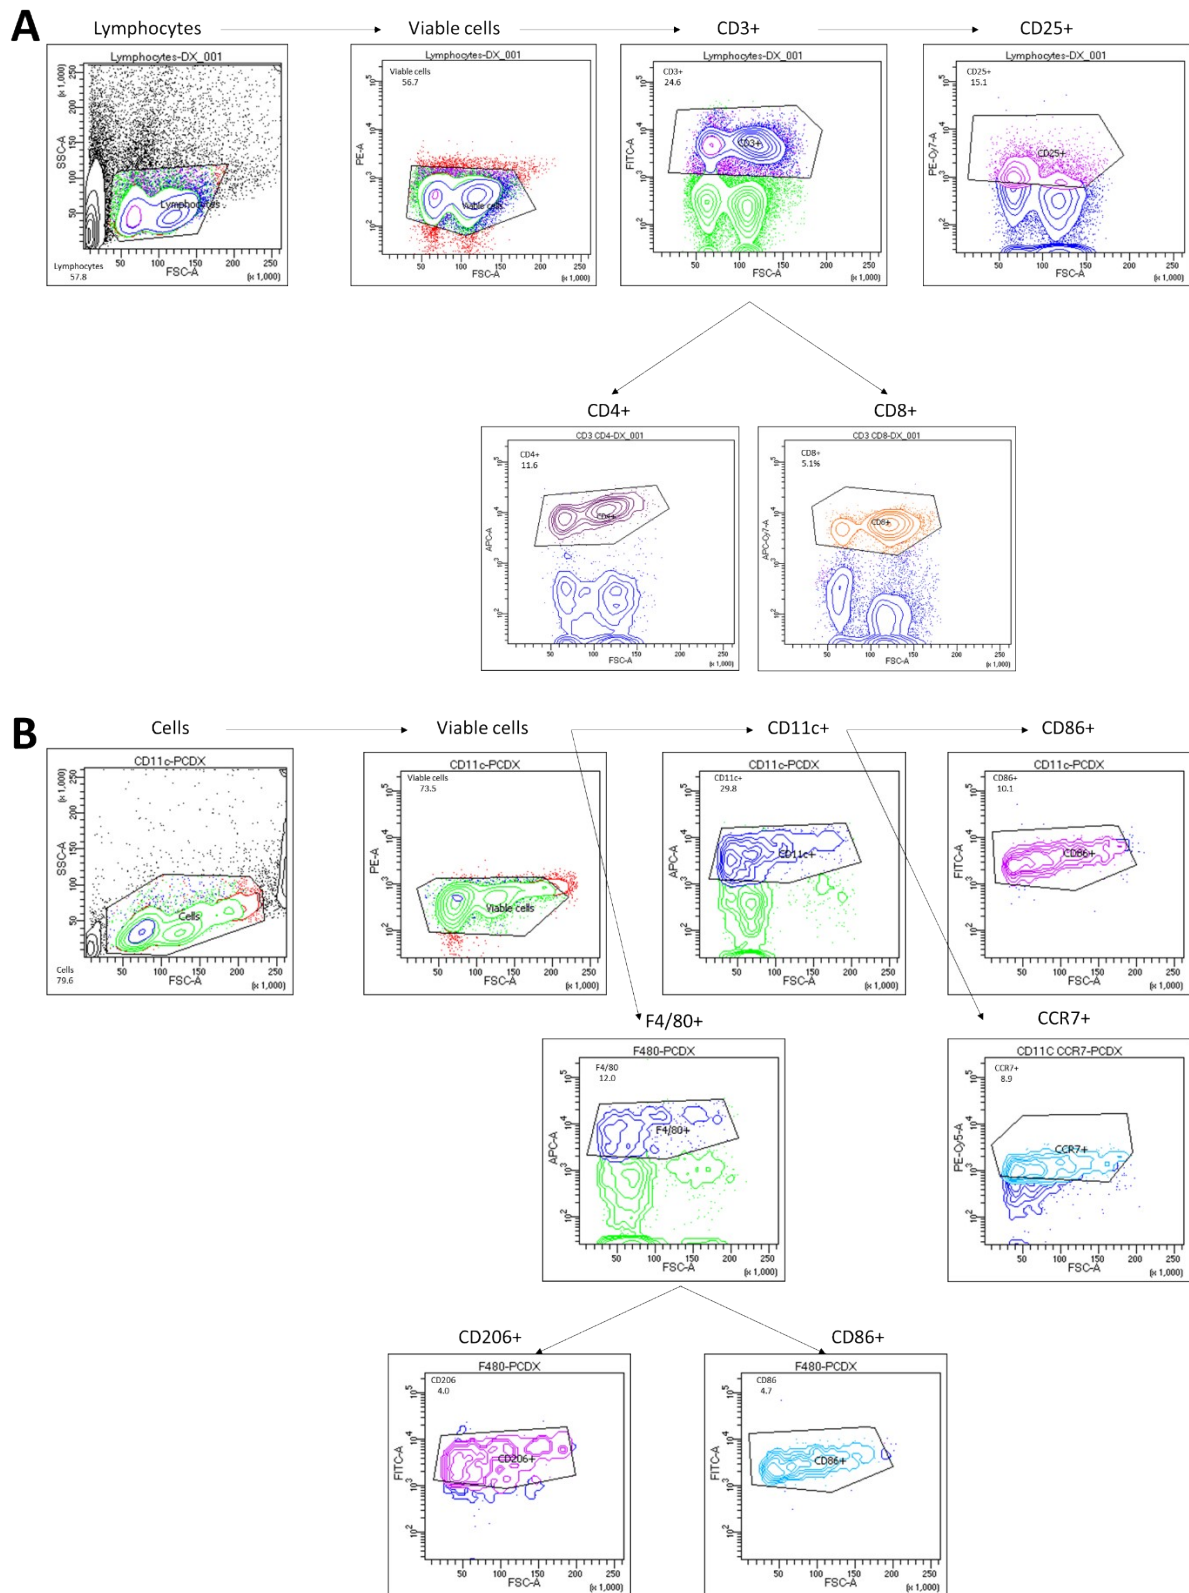

**Figure S6.** Representative flow cytometry flow from C57BL/6 mice tissue samples post hydrogel injection, showing gating strategy for A) CD3+, CD4+, CD8+ T cell subsets and B) CD11c+ with activation markers CD86 and CCR7, as well as F4/80+ cells with CD206 and CD86, %total of each subsets are labelled in the graphs.



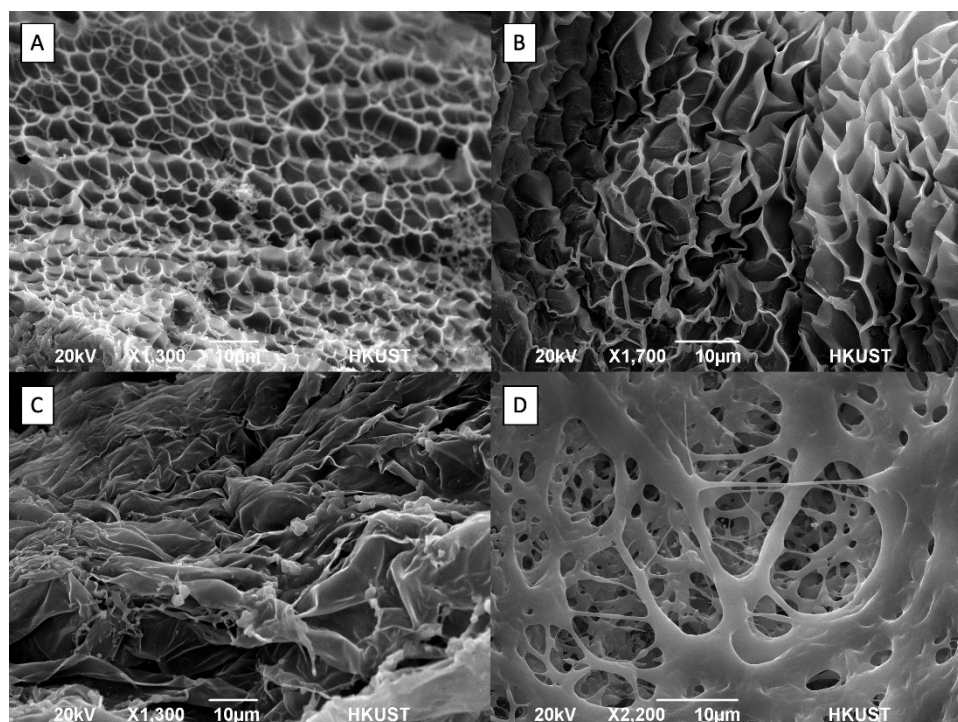

**Figure S7. Scanning electron microscope images of A) DX, B) DEDX, C) CMDX and D) PCDX.** Bulk hydrogels were prepared with 40% wt/V DX-OAc, DEDX-OAc, CMDX-OAc and PCDX-OAc and crosslinked with DTT. Hydrogels were incubated overnight at 37°C, in humidified chamber to ensure complete gelation. Subsequently, hydrogels were allowed to swell in ddH<sub>2</sub>O for 2 hr. The hydrogels were blotted dry with Kimwipe and compaction with centrifuge, 1000 rpm for 30 sec. Subsequently, hydrogels were subjected to snap freezing in liquid N<sub>2</sub> and lyophilization. The freeze dried hydrogels were cut into smaller pieces of ~ 2 mm and subjected to gold sputter coating (K575xd, Emitech Ltd). The hydrogels were imaged with scanning electron microscope (JSM-7100F JEOL) at 20 kV.

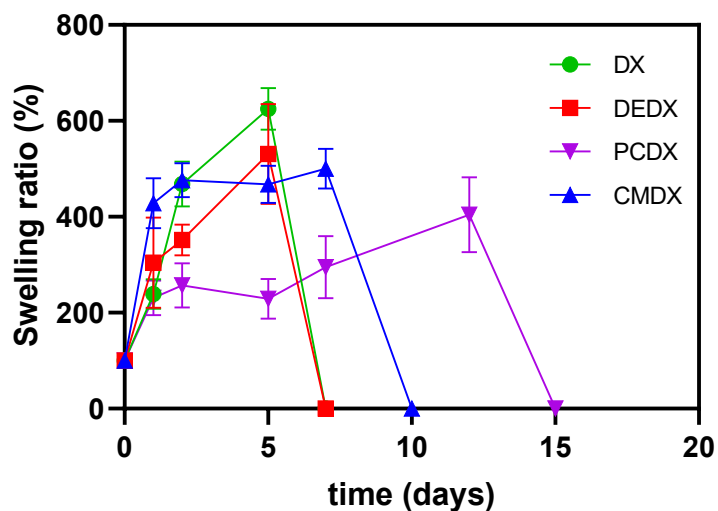

**Figure S8.** The swelling behavior of degradable -OAc modified DX, CMDX, DEDX and PCDX bulk hydrogels.

**Table S1.** Degree of modifications (DM) of -OAc on hydrogel precursors, estimated from <sup>1</sup>H-NMR spectra

| Hydrogel precursors | -OAc DM(%) |
|---------------------|------------|
| DX-OAc              | 6.75       |
| CMDX-OAc            | 5.43       |
| DEDX-OAc            | 6.05       |
| PCDX-OAc            | 8.42       |

**Table S2.** The average endotoxin level released from hydrogel washed with PBS after 24 hours incubation.

| <b>Hydrogels</b> | <b>Average Endotoxin Level (EU/mL)</b> |
|------------------|----------------------------------------|
| CM               | $0.165 \pm 0.045$                      |
| DE               | $0.109 \pm 0.015$                      |
| DX               | $0.125 \pm 0.004$                      |
| PC               | $0.197 \pm 0.002$                      |
| PBS              | $0.0128 \pm 0.004$                     |
