# Supplementary figures and images for: Vaccine delivery by zwitterionic polysaccharide-based hydrogel microparticles showing enhanced immunogenicity and suppressed foreign body responses
Source: Royal Society of Chemistry journal article supplement (doi:10.1039/d2bm01960d), 2023-01-01

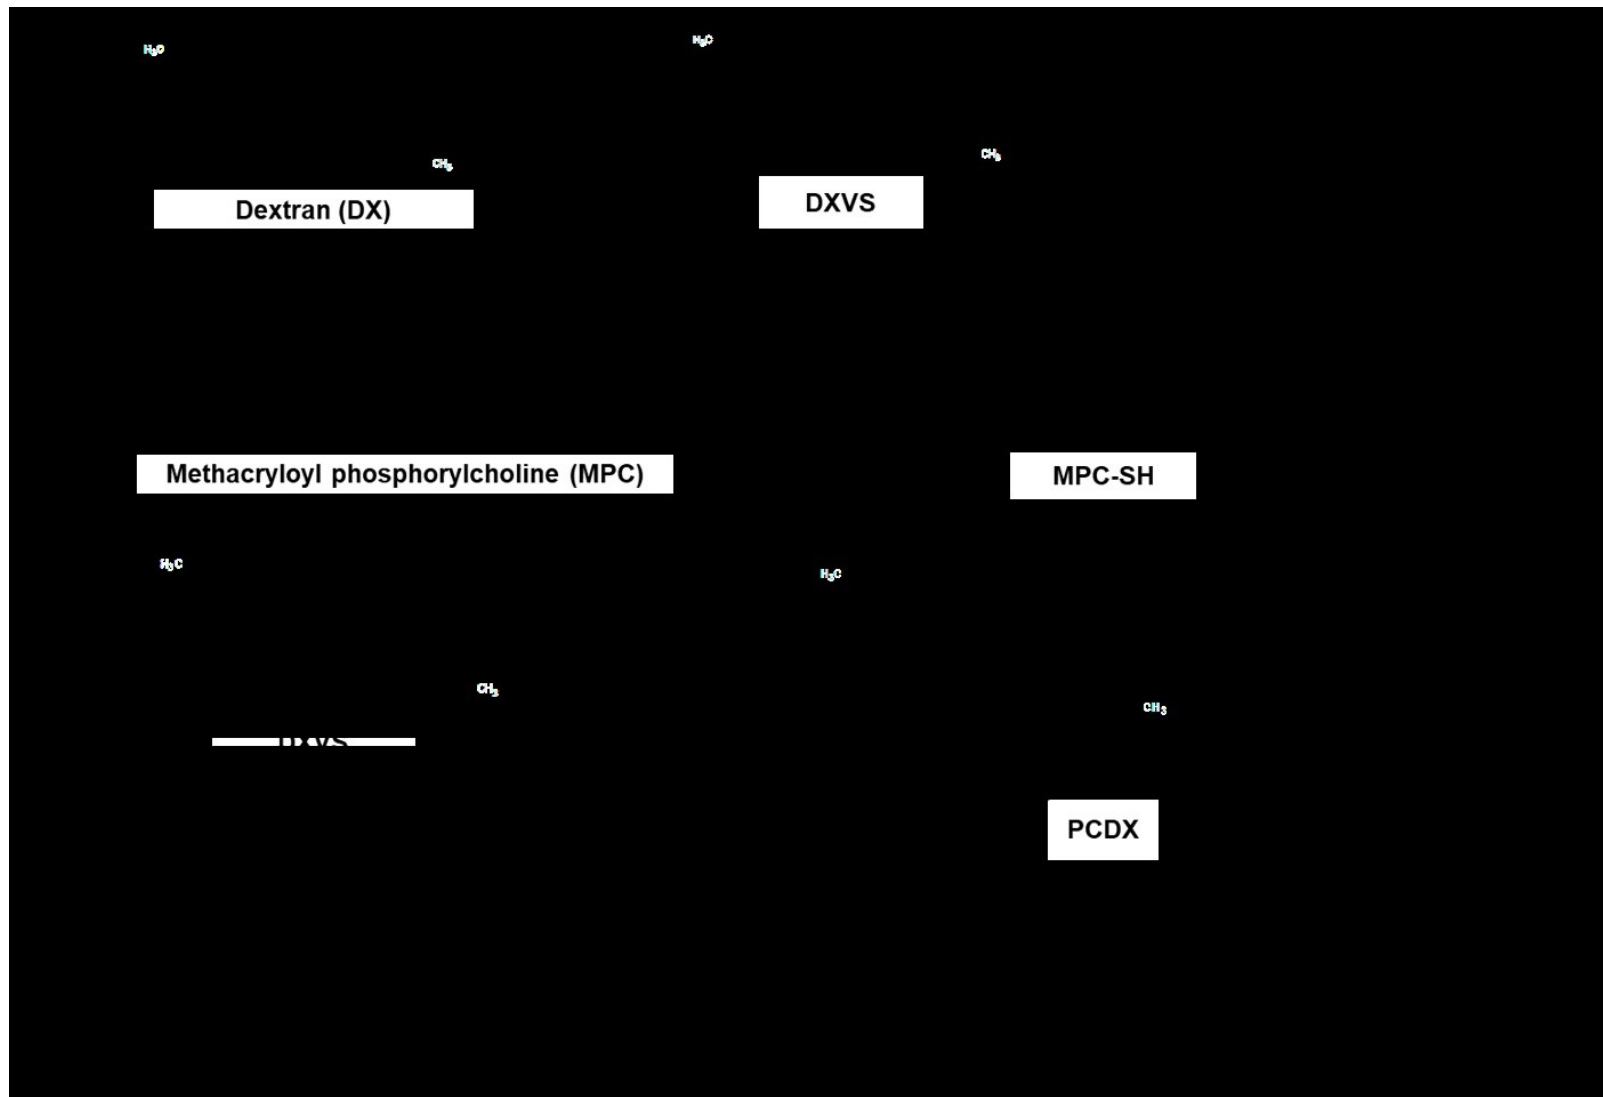

Supplement: d2bm01960d2.pdf [file d2bm01960d2.pdf]

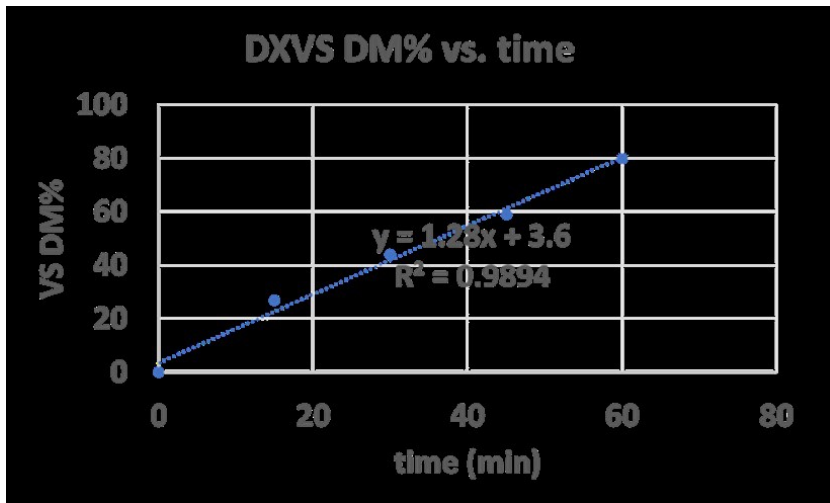

Supplement: d2bm01960d3.pdf [file d2bm01960d3.pdf]

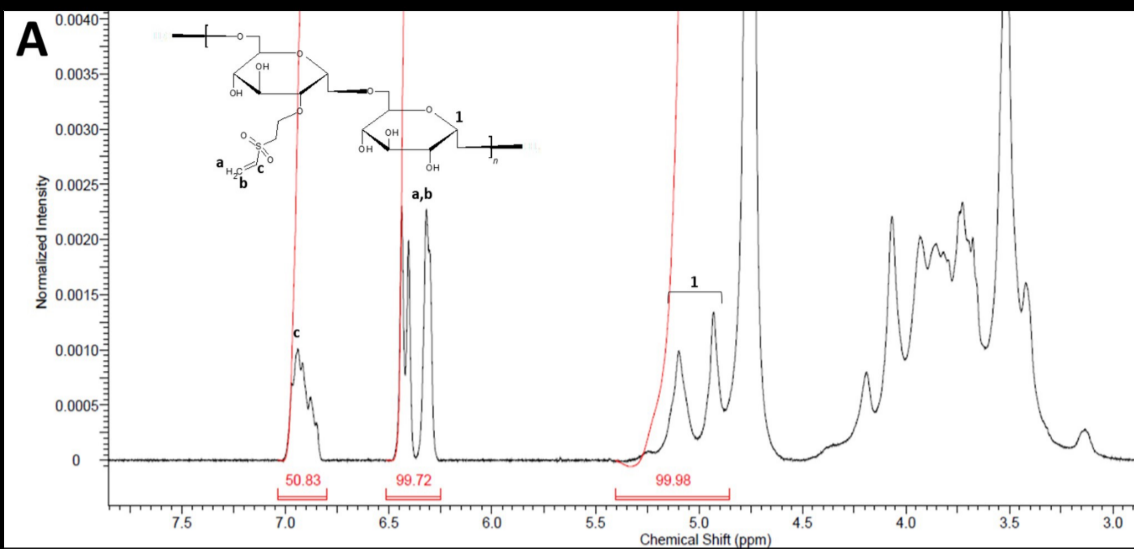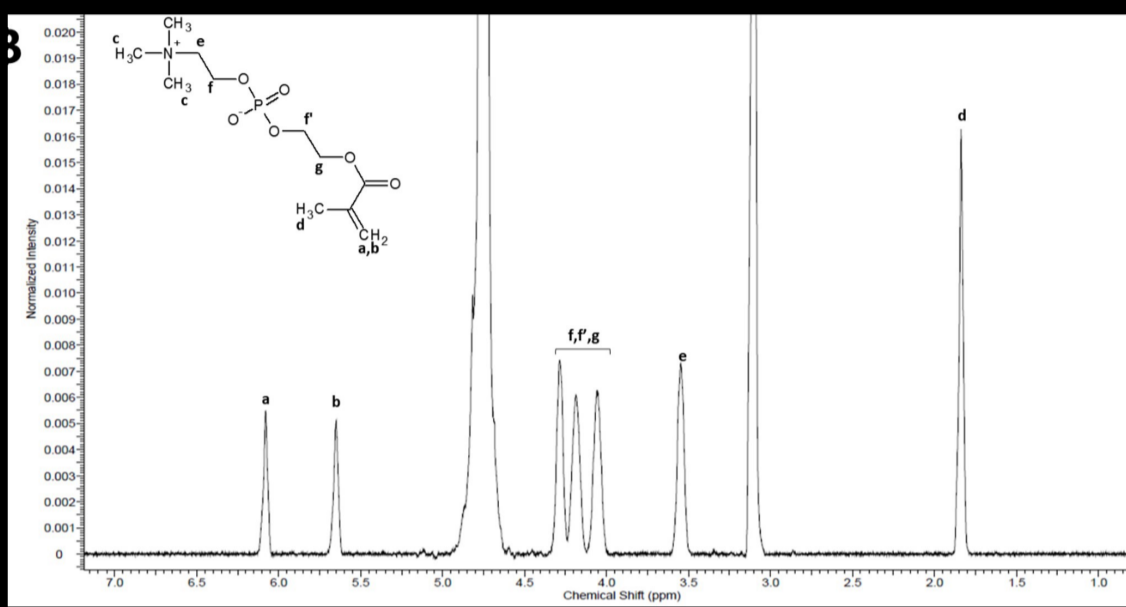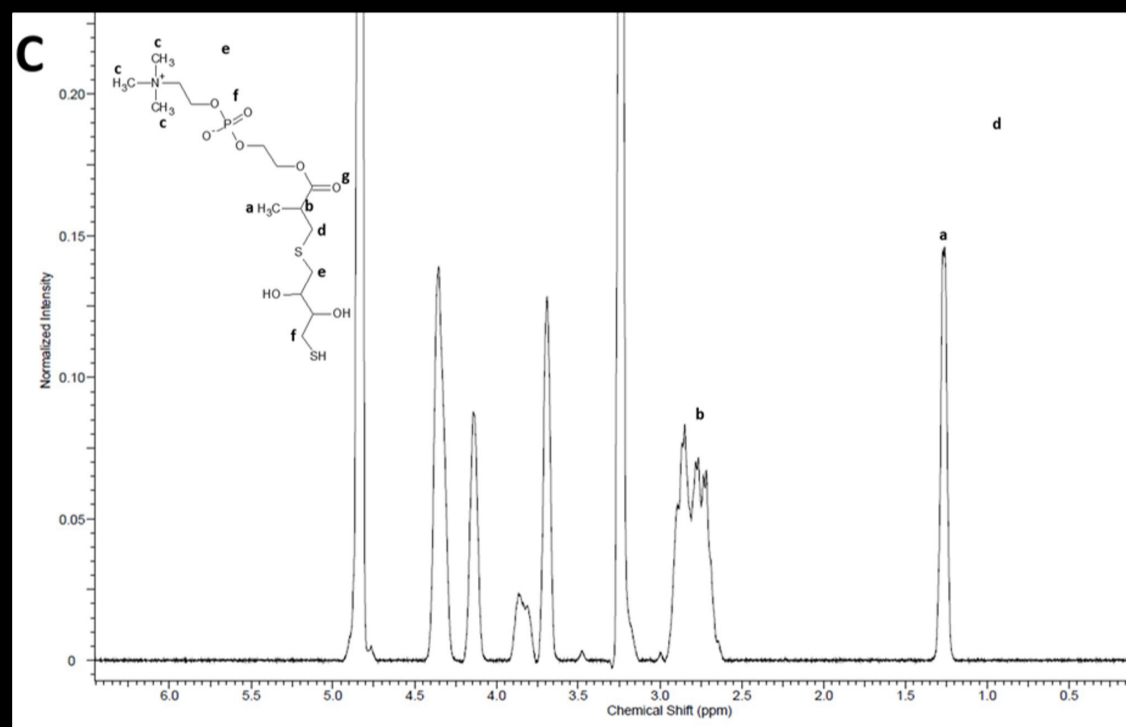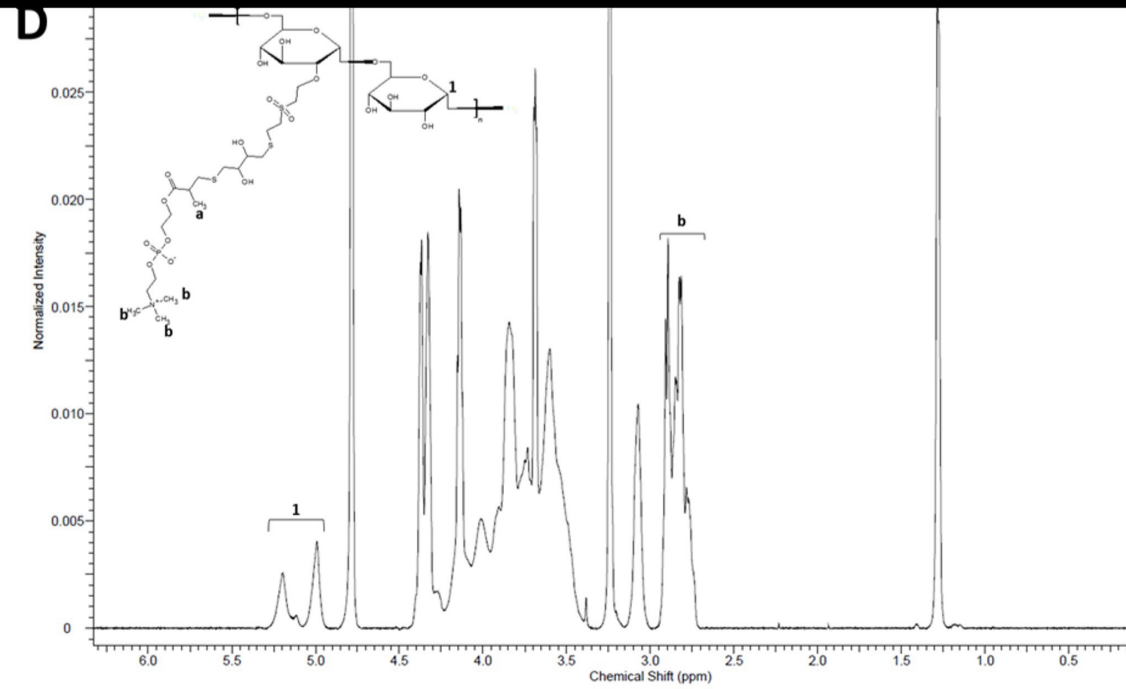

Supplement: d2bm01960d4.pdf [file d2bm01960d4.pdf]

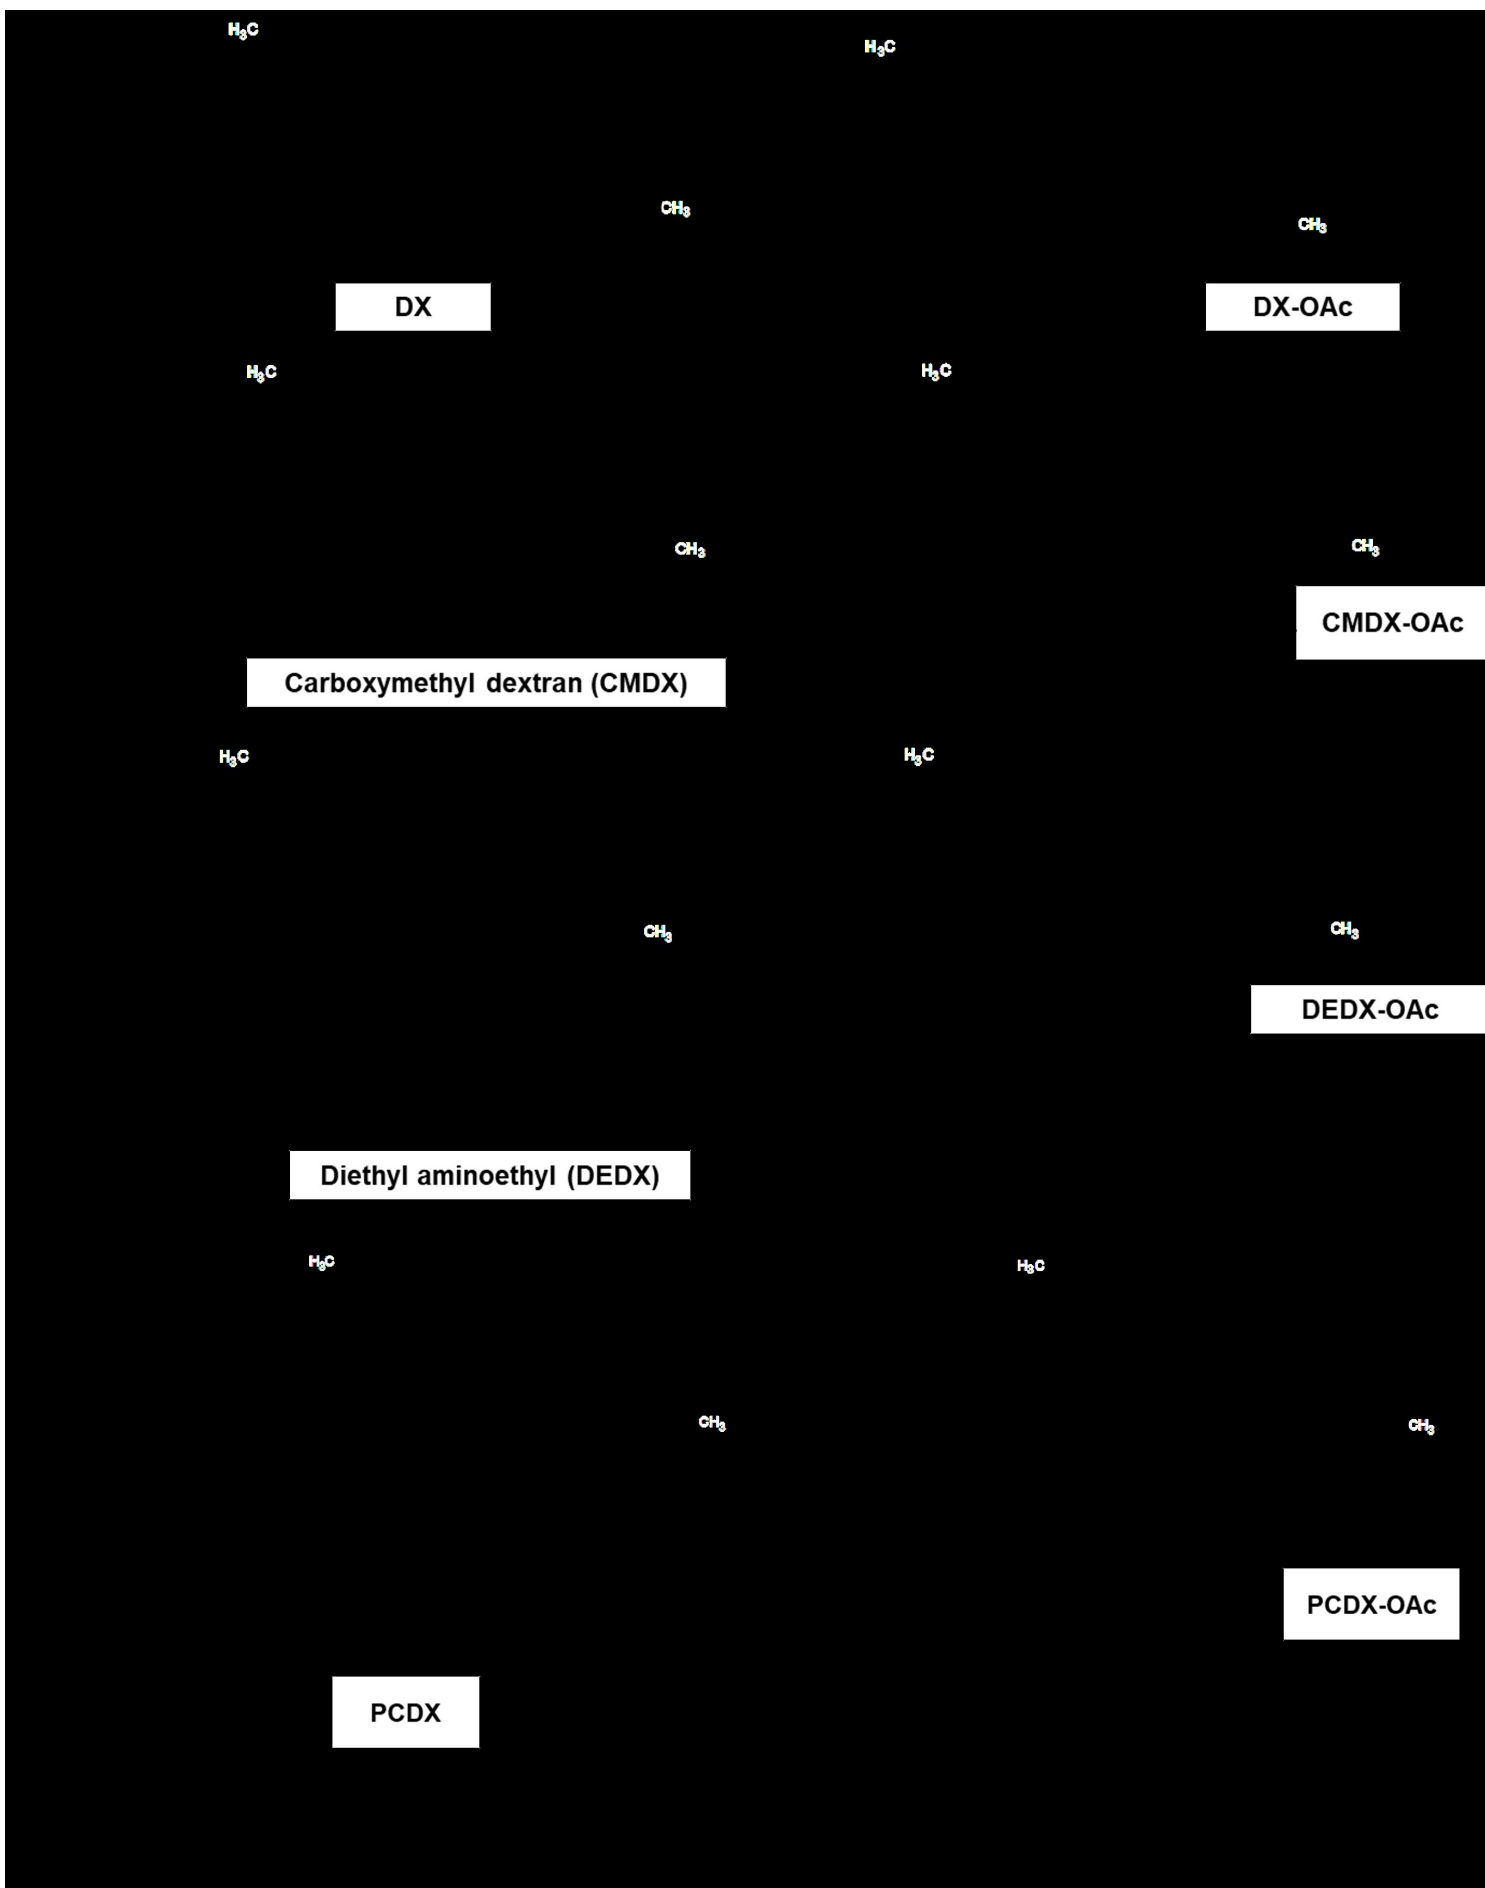

Supplement: d2bm01960d5.pdf [file d2bm01960d5.pdf]

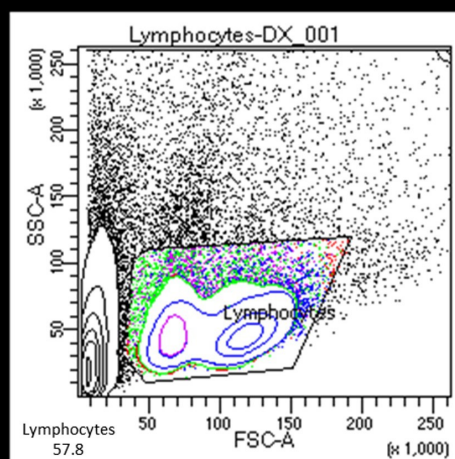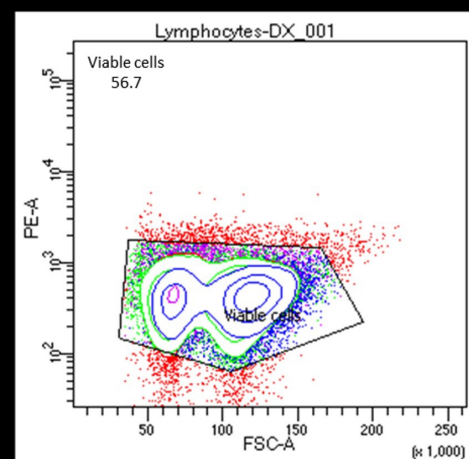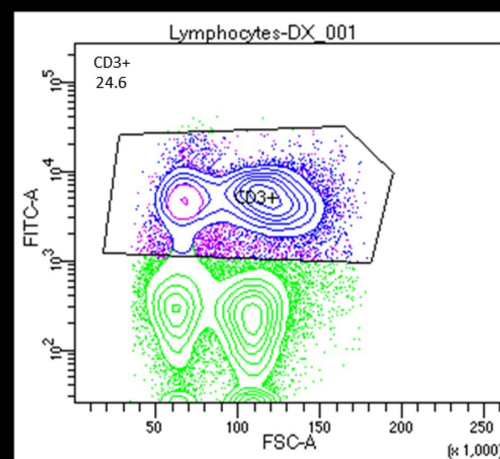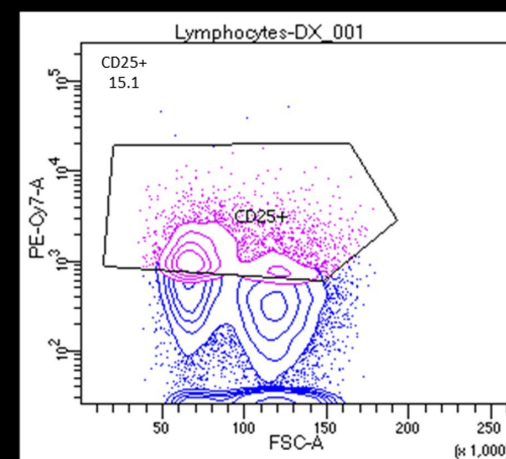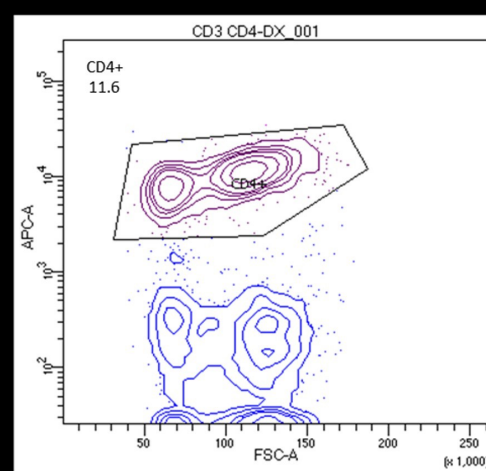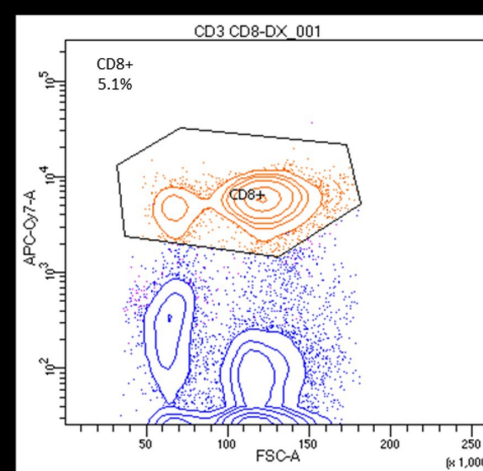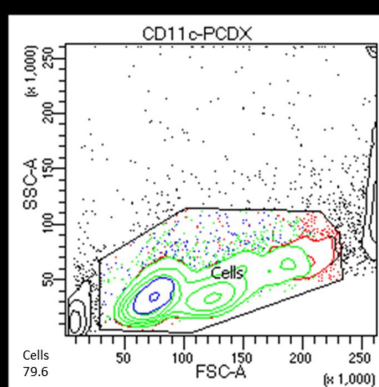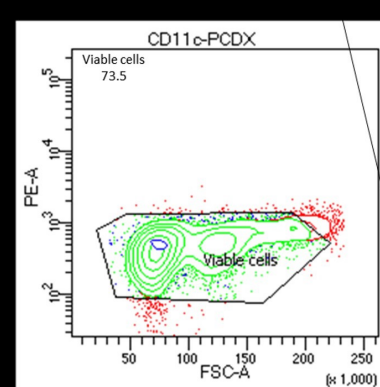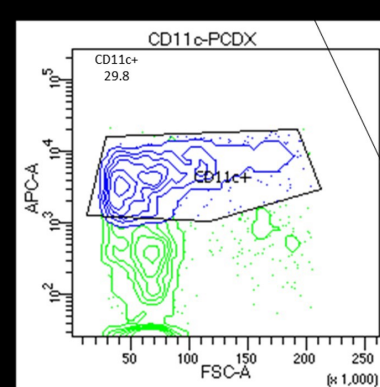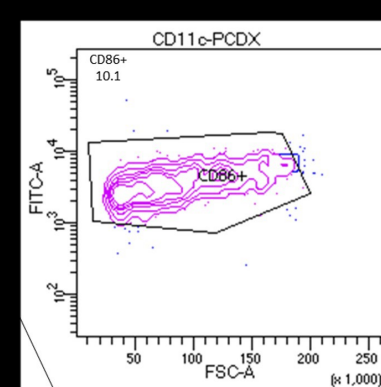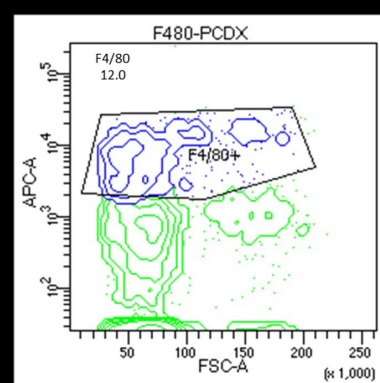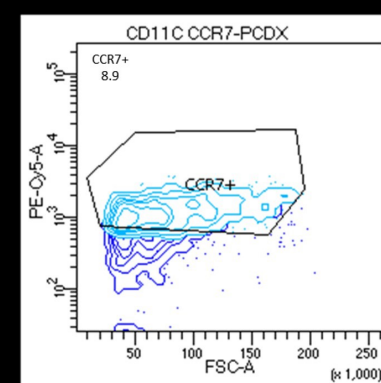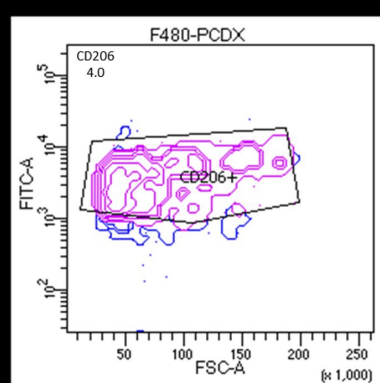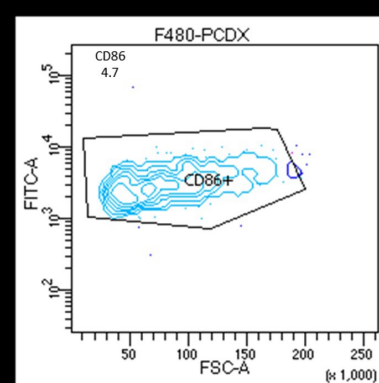

Supplement: d2bm01960d7.pdf [file d2bm01960d7.pdf]

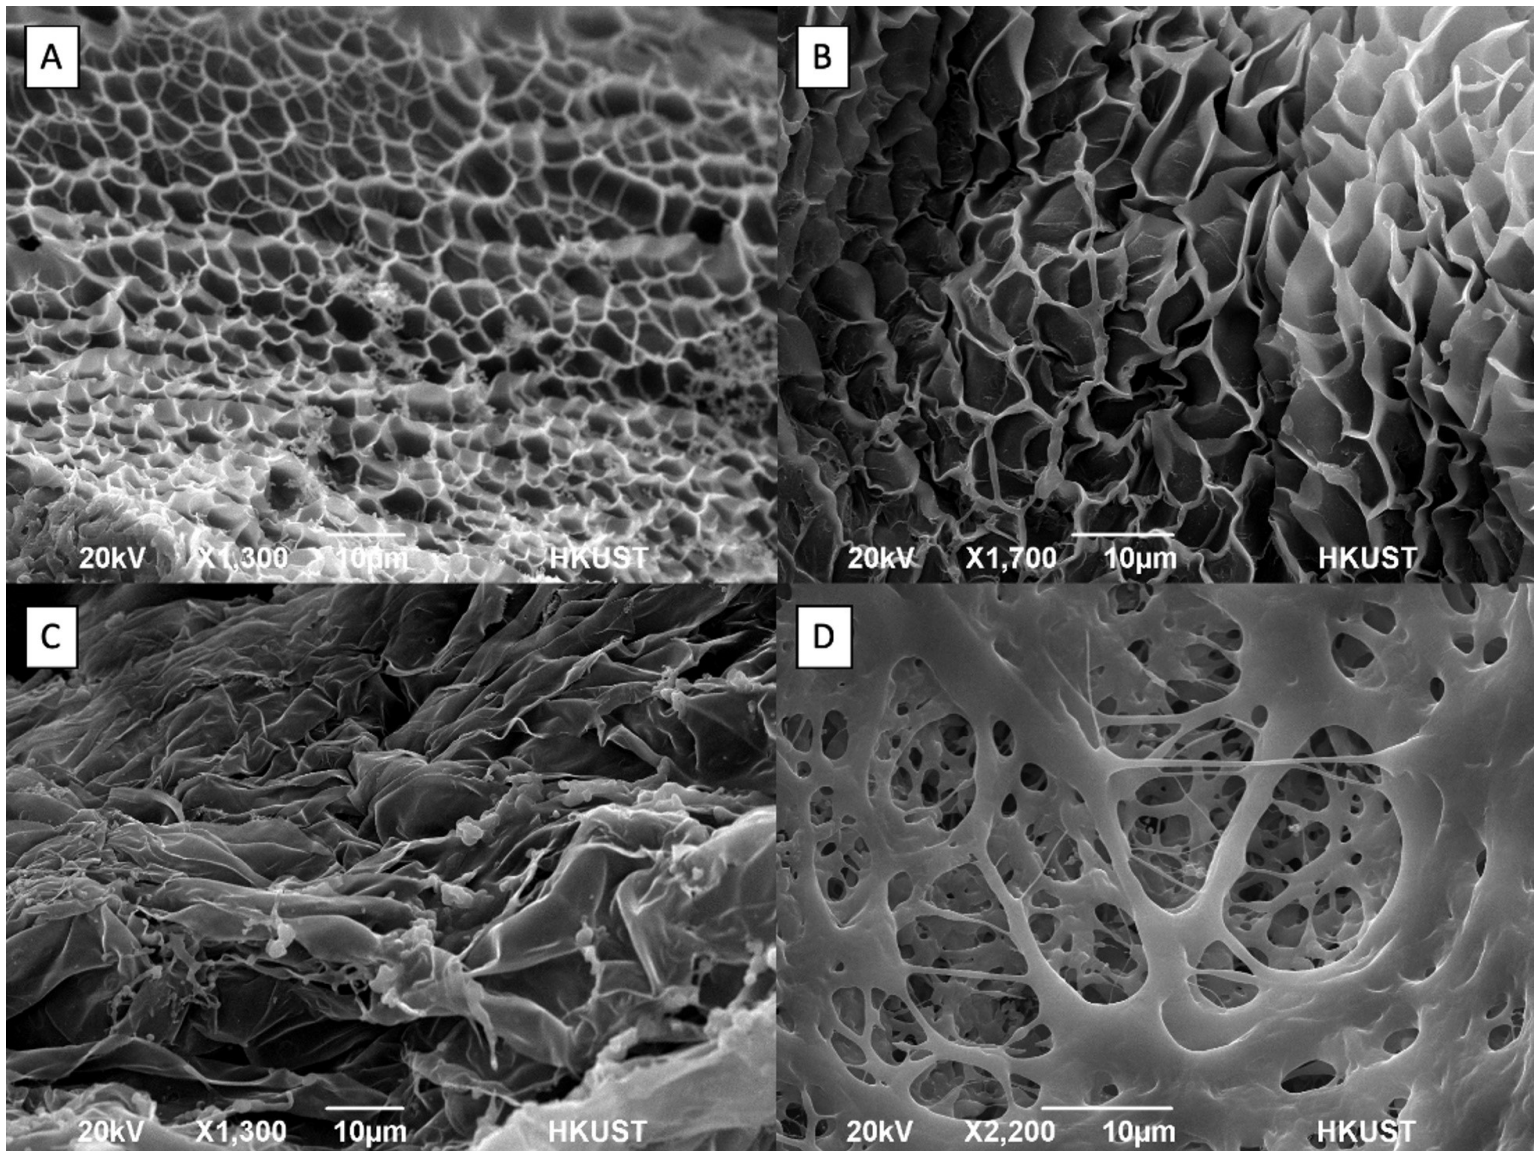

Supplement: d2bm01960d8.pdf [file d2bm01960d8.pdf]

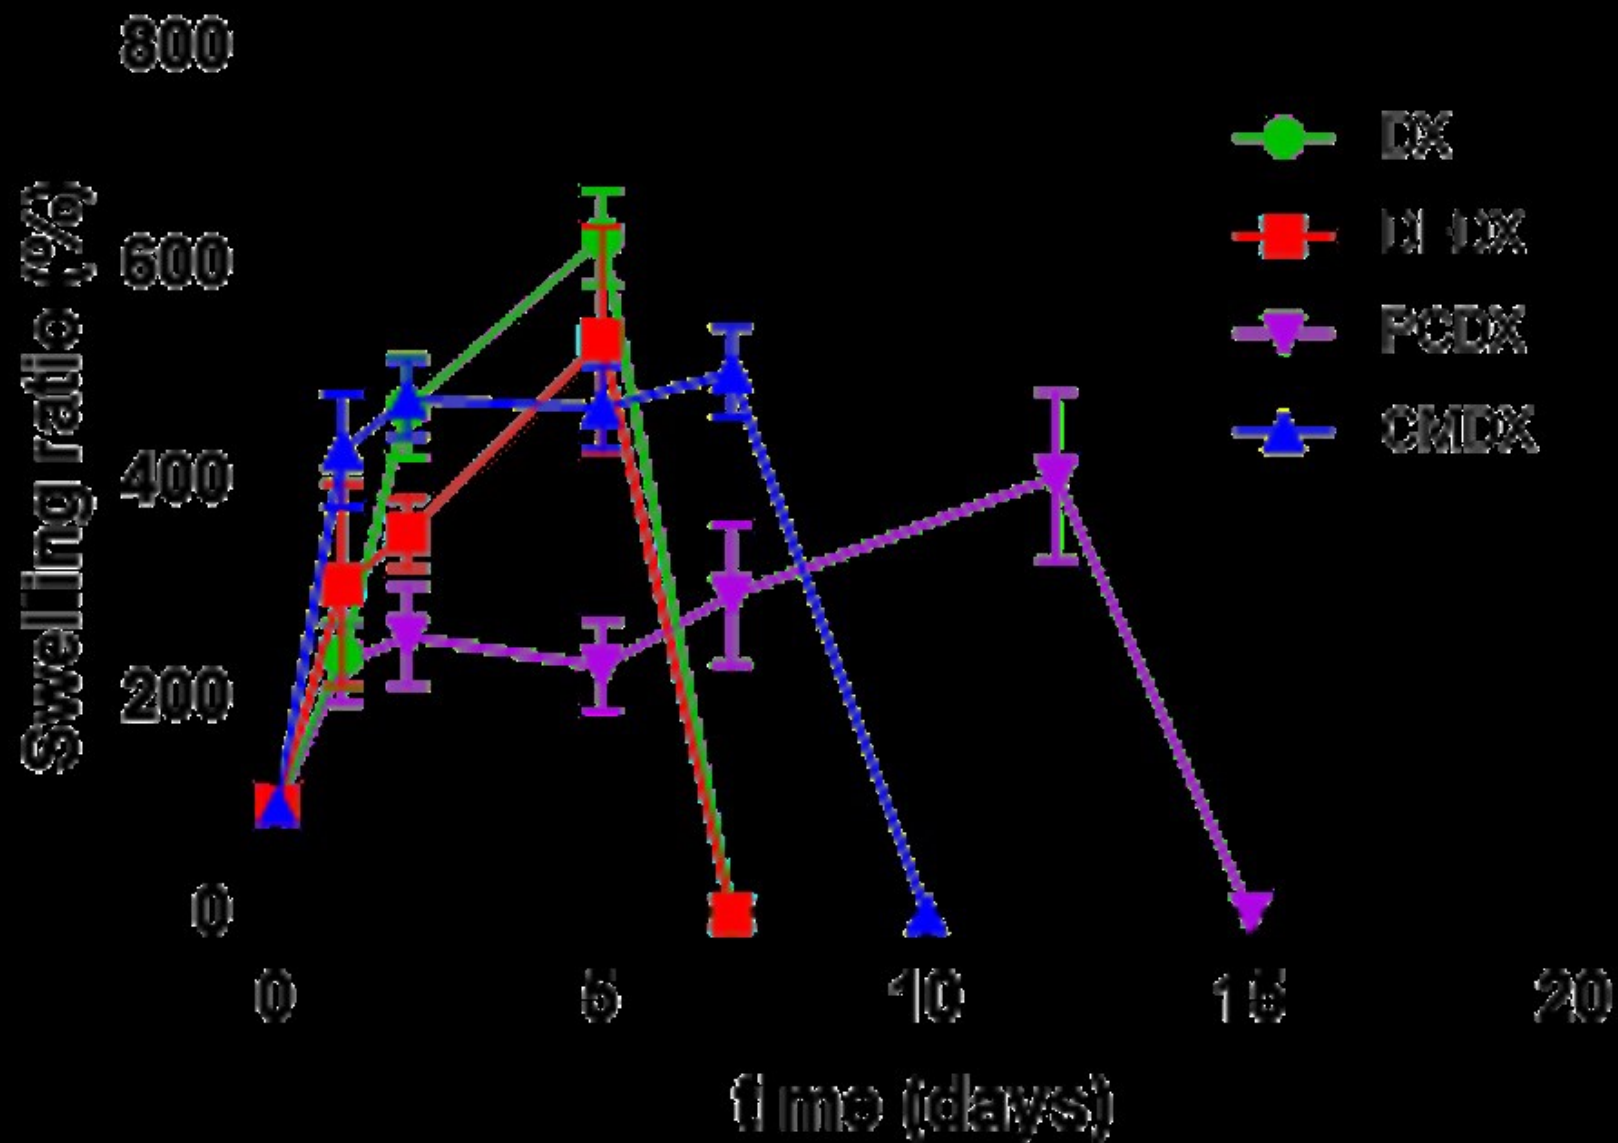

Supplement: d2bm01960d9.pdf [file d2bm01960d9.pdf]
